# Supplementary material for: Performance and mass transfer of aqueous fluoride removal by a magnetic alumina aerogel
Source: Royal Society of Chemistry journal article supplement (doi:10.1039/c6ra23532h), 2016-01-01
Supplement: c6ra23532h1.pdf [file c6ra23532h1.pdf]

## Supplementary Materials

*for*

### Performance and mass transfer of aqueous fluoride removal by magnetic alumina aerogel

Wen Yang<sup>1</sup>, Xiaomin Dou<sup>1\*</sup>, Yonghuan Li<sup>1</sup>, Dinesh Mohan<sup>2</sup>, Charles U. Pittman, Jr.<sup>3</sup>,  
Yong Sik Ok<sup>4</sup>

<sup>1</sup>College of Environmental Science and Engineering, Beijing Forestry University,  
Beijing 100083, P.R. China;

<sup>2</sup>School of Environmental Sciences, Jawaharlal Nehru University, New Delhi 110067,  
India;

<sup>3</sup>Department of Chemistry, Mississippi State University, Mississippi State,  
Mississippi 39762, United States;

<sup>4</sup>Korea Biochar Research Center & Department of Biological Environment, Kangwon  
National University, Chuncheon 200-701, Korea;

This file contains,

- a) Five tables (Tables S1 – S5)
- b) Five figures (Figs. S1 – S5)

**TABLES:****Table S1** The concentrations of the co-existing anions used in studying interferences of other species with F<sup>-</sup> adsorption by magnetic alumina aerogel.

| Co-existing anions                   | HCO <sub>3</sub> <sup>-</sup> | PO <sub>4</sub> <sup>3-</sup> | SO <sub>4</sub> <sup>2-</sup> | SiO <sub>4</sub> <sup>4-</sup> | NO <sub>3</sub> <sup>-</sup> | NO <sub>2</sub> <sup>-</sup> | Cl <sup>-</sup> |
|--------------------------------------|-------------------------------|-------------------------------|-------------------------------|--------------------------------|------------------------------|------------------------------|-----------------|
| Concentrations (mg L <sup>-1</sup> ) | 100                           | 5                             | 300                           | 9                              | 30                           | 30                           | 300             |

**Table S2** BET surface areas and pore properties for alumina, magnetite and magnetic aerogel alumina samples

| Samples                                                              | BET surface area (m <sup>2</sup> g <sup>-1</sup> ) | Pore volume (mL g <sup>-1</sup> ) | Average BJH pore diameter (nm) |
|----------------------------------------------------------------------|----------------------------------------------------|-----------------------------------|--------------------------------|
| Alumina aerogel                                                      | 320.3                                              | 1.0                               | 8.8                            |
| Alumina aerogel (ground for 3 h)                                     | 378.7                                              | 1.2                               | 9.8                            |
| Magnetite                                                            | 89.9                                               | 0.2                               | 8.4                            |
| Magnetite (ground for 3 h)                                           | 92.0                                               | 0.2                               | 8.4                            |
| Magnetic aerogel                                                     | 215.1                                              | 0.4                               | 6.1                            |
| Magnetic aerogel (ground for 3 h)                                    | 223.9                                              | 0.4                               | 5.9                            |
| Magnetic aerogel after adsorption of F <sup>-</sup>                  | 243.2                                              | 0.5                               | 7.3                            |
| Magnetic aerogel after adsorption of F <sup>-</sup> (ground for 3 h) | 268.7                                              | 0.4                               | 6.0                            |



**FIGURES:**

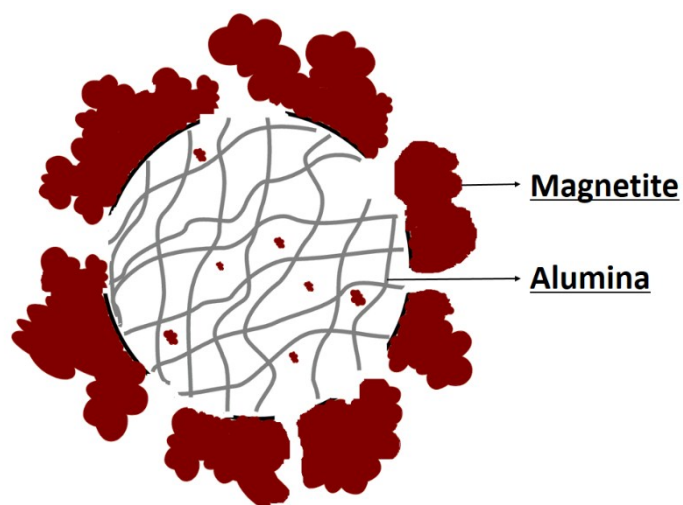

**Fig. S1** An illustration of the favored core-shell structure of the magnetic aerogel alumina adsorbent

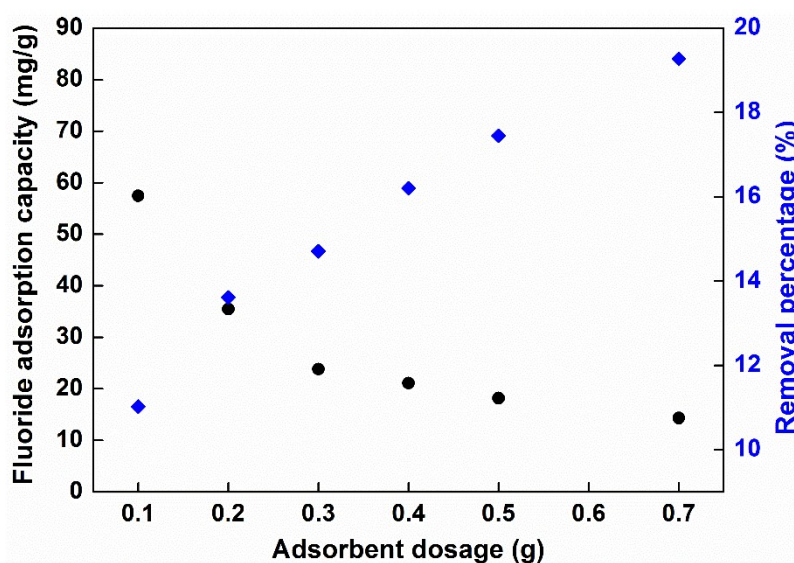

**Fig. S2** The effect of MAA dose on its F<sup>-</sup> removal performance. Initial F<sup>-</sup> concentrations, 50 mg L<sup>-1</sup>; adsorbent dose, 0.1-0.7 g L<sup>-1</sup>; total solution volumes, 100 mL; pH 5.0 ± 0.1; temperature, 25 ± 1 °C, and shaking time, 24 h.

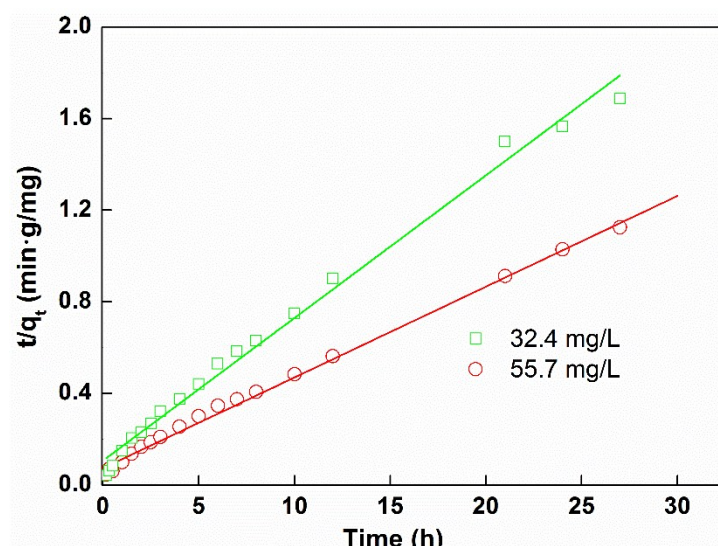

**Fig. S3** Kinetics of F<sup>-</sup> adsorption on the magnetic alumina aerogel adsorbent (MAA). The solid lines represent the linear pseudo-second order fittings. Initial F<sup>-</sup> concentrations, 32 mg L<sup>-1</sup> and 56 mg L<sup>-1</sup>; adsorbent dose, 0.3 g L<sup>-1</sup>; total solution volumes, 1 L; pH 5.0 ± 1; temperature, 25 ± 1 °C.

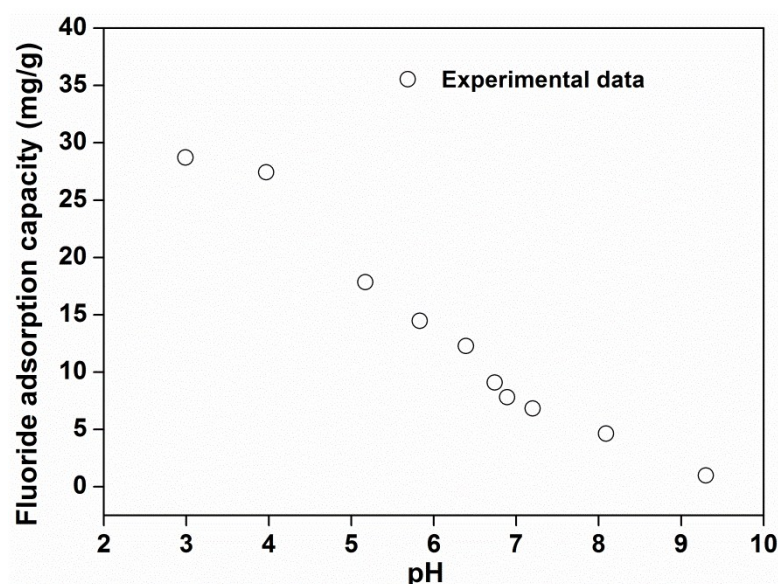

**Fig. S4** Effect of pH on F<sup>-</sup> adsorption onto the magnetic alumina aerogel adsorbent (MAA). Initial F<sup>-</sup> concentrations, 42.2 mg L<sup>-1</sup>; adsorbent dose, 0.3 g L<sup>-1</sup>; total solution volumes, 100 mL; pH range, 3 - 10; temperature, 25 ± 1 °C, and shaking time, 24 h.

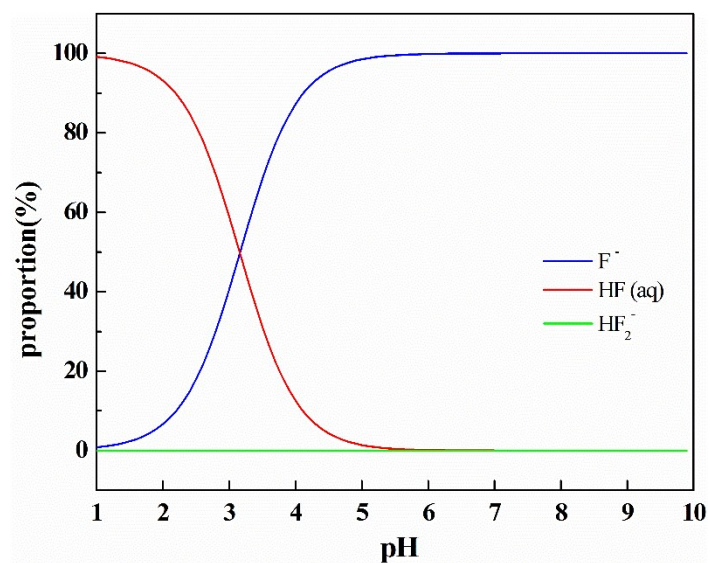

**Fig. S5** Speciation diagram for  $F^-$  in water showing the relative proportions of each species. Values were calculated using Visual Minteq v 3.0 with initial  $F^- = 10 \text{ mmol L}^{-1}$ , temperature = 25 °C and ion strength was calculated at each point.

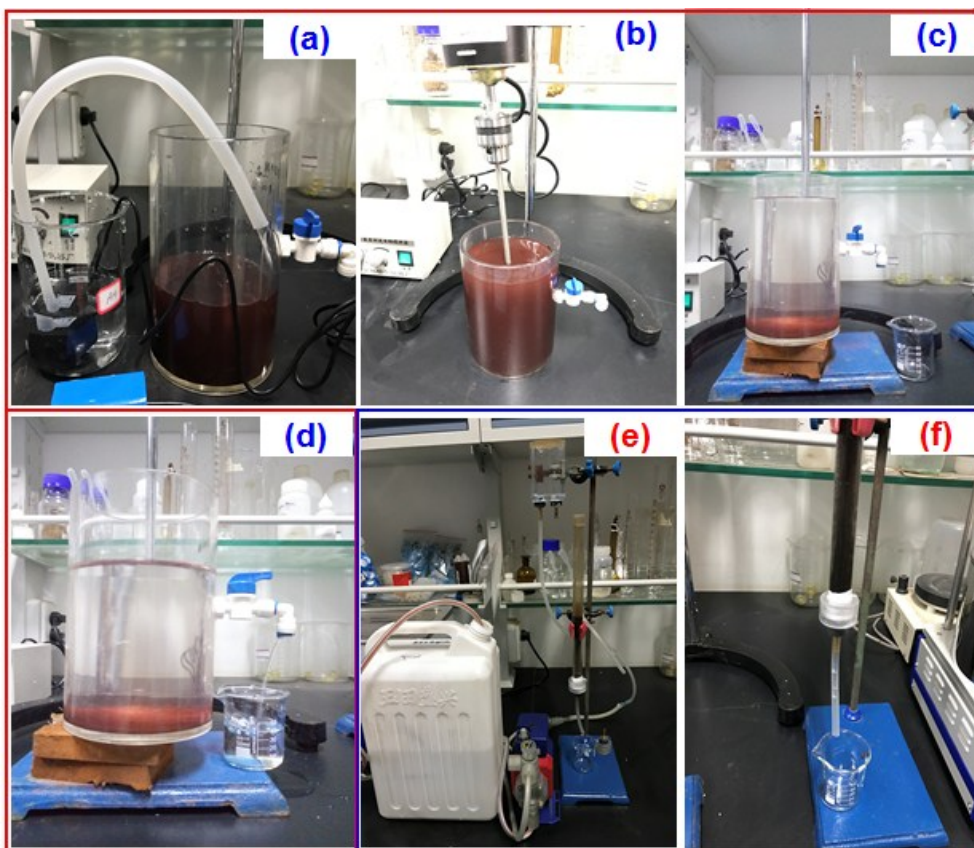

Fig. S6 The MAA adsorbent was demonstrated to be used in a magnetic separation-enhanced sequencing batch (MSES) mode including four steps, which are (1) influent fill (a), (2) adsorption (b), (3) magnetic separation (c) and (4) treated water withdraw (d), and in a packed bed mode with problems of fluent flow ((e) and (f)).
